# Supplementary material
Source: PubMed Central journal article supplement (PMC5580898)
Supplement: 10.1194_M077198_jlr.M077198-1.pdf [file 10.1194_M077198_jlr.M077198-1.pdf]

## Supplementary information

### Supplementary Material

#### Construction of *fat-5::gfp* and *fat-7::gfp* transgenic strains

The *fat-5::gfp* and *fat-7::gfp* transgenes were created using methods previously described by Frokjaer-Jensen *et al.* (1), and the transgenic strains were created by microinjection. In brief, an extrachromosomal transgenic strain was made by injection into the EG4322 (*ttTi5605;unc-119(ed3)*). The injection mix consisted of 50 ng/μl pCFJ151 (*ttTi5605\_MCS*) inserted with a target DNA fragment from N2 and the GFP gene from pPD95.75, pJL43.1 (*P<sub>glh-2::MosTase::glh-2utr</sub>*), and 2.5 ng/μl pCFJ90 (*P<sub>myo-2::mCherry</sub>*). DNA mixtures were injected into the gonads of young adult *C. elegans*. The integrated transgenic strains were assigned *kunEx161[unc-119(ed3);fat-5::gfp+unc-119(+)]* and *kunEx162[unc-119(ed3);fat-7::gfp+unc-119(+)]*. The *fat-5::gfp* and *fat-7::gfp* are translational constructs including the promoter regions above 2 kb upstream of the start codon and genomic sequences of *fat-5* and *fat-7*, respectively. The primers used for amplification of *fat-5::gfp* and *fat-7::gfp* were *fat-5F*: GGATATCTGGATCCACGAAAAGTTGCCGGAAATCAAGTG, *fat-5R*: GTCGACCTGCAGGCATGCAATCCCAATTTGTGGAGCATTTTCT, *fat-7F*: GGATATCTGGATCCACGAAGAGCCGAATATGCACAGAAA, *fat-7R*: GTCGACCTGCAGGCATGCAACATGATCGATTTTTTTTCTTGATTCTTC, GFP+unc-54 3'UTR F: TTGCATGCCTGCAGGTCGAC, GFP+unc-54 3'UTR R: CCAGAGCTCACCTAGGTATCTGCCGACTAGTAGGAAACAGT, pCFJ151-F: AGATACCTAGGTGAGCTCTGG, and pCFJ151-R: TTCGTGGATCCAGATATCC.

#### Primer information for *sbp-1* and *sur-7* cDNA

The forward primer sequences for *sbp-1* cDNA were F: CATGGTGGACGCACGTTCTGAC; and the reverse primer was R: TCGGCACGTGAGCTCGTAGAC. The primer sequences for

*sur-7* transcripts in the wild type and three alleles (*kun84*, *tm6523* and *ku119*) were F:  
CAGTTGAAGAGGCTCATGAGC and R: AACGTCTCCAGTACTTTTCGG.

### **Supplementary references**

1. Frokjaer-Jensen, C., M. W. Davis, C. E. Hopkins, B. J. Newman, J. M. Thummel, S. P. Olesen, M. Grunnet, and E. M. Jorgensen. 2008. Single-copy insertion of transgenes in *Caenorhabditis elegans*. *Nat Genet* **40**: 1375-1383.

## Supplementary Figures and Figure Legends

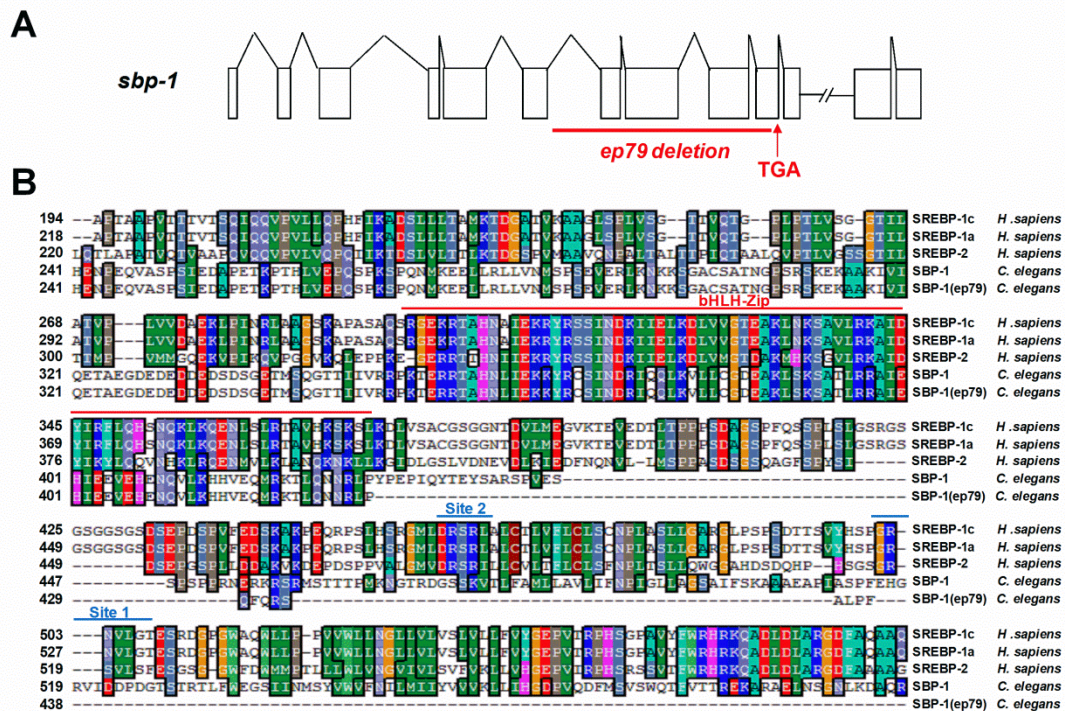

### Supplemental Figure S1. *sbp-1* encodes a homologue of SREBP in *C. elegans*.

(A) The gene structure and *ep79* mutation of *sbp-1*. The *ep79* mutation has a 2171 bp deletion, which leads to early protein maturation by the termination codon of TGA.

(B) Multi-alignment of SREBP from *C. elegans* [SBP-1 and truncated SBP-1(ep79)] and humans. The conserved domain is shown above the sequences. Red bar: The transcriptional domain. Blue bar: The splice site 1 and site 2 by S1P and S2P, respectively. SREBP-1a:

NP\_004167.1, SREBP-1c: NP\_001308025.1, SREBP-2: NP\_004590.2, SBP-1: CAA21042.1.

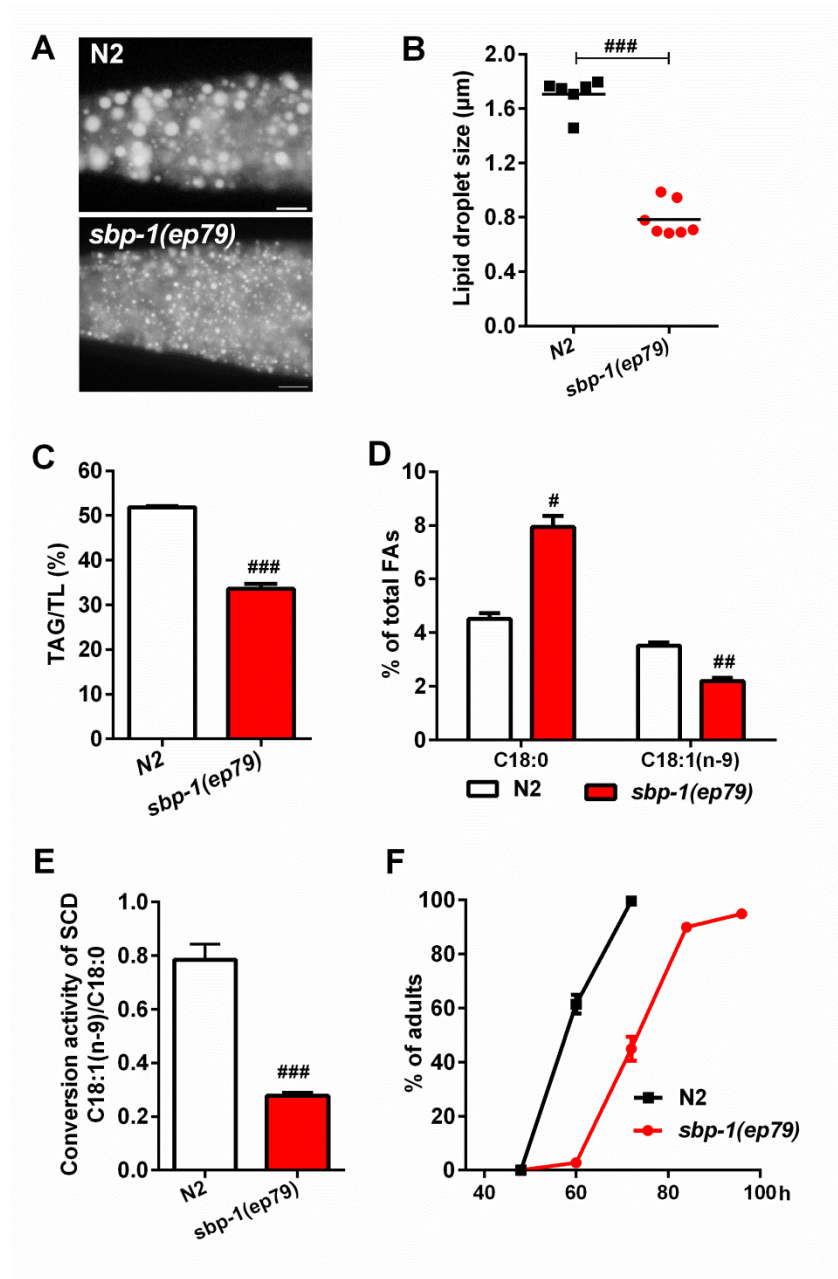

**Supplemental Figure S2. The phenotypes of *sbp-1(ep79)* mutant.**

(A) Nile Red staining of fixed worms. Representative animals, the anterior is on the right and the posterior is on the left. Scale bar represents 10  $\mu\text{m}$ .

(B) Lipid droplet size in the posterior region of intestines from 6-7 worms of each worm strain. The data are presented as scatter dot plots and means.

(C) Percentage of triacylglycerol (TAG) in total lipid (TAG + PL). The data are presented as the mean  $\pm$  SEM of 3 biological repeats.

(D) Percentage of C18:0 and C18:1(n-9) in total fatty acids. The data are presented as the mean  $\pm$  SEM of 4 biological repeats.

(E) The conversion activity of SCD presented as the ratio of C18:1(n-9)/C18:0. The data are presented as the mean  $\pm$  SEM of 4 biological repeats.

(F) The growth rate of worms. The data are presented as the mean  $\pm$  SEM of 3 biological repeats, of which at least 500 worms were counted for each worm strain.

The statistical analysis was performed using analysis of variance (ANOVA). Significant difference between *sbp-1(ep79)* mutant and wild type (N2), #:  $P < 0.05$ , ##:  $P < 0.01$  ###:  $P < 0.001$ .

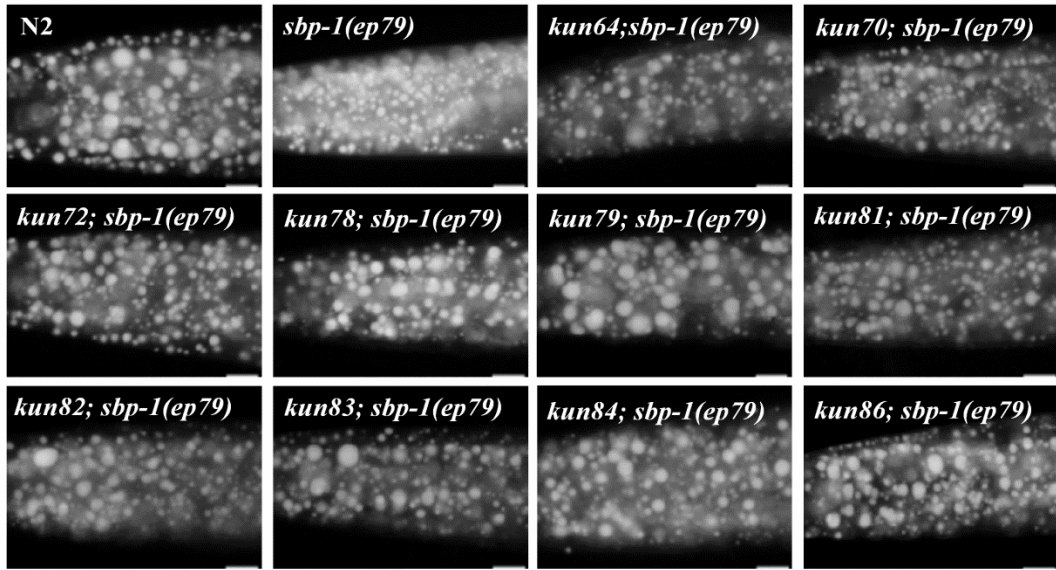

**Supplemental Figure S3. Nile Red staining of fixed worms of *sbp-1(ep79)* suppressors.**  
Representative animals, the anterior is on the right and the posterior is on the left. Scale bar represents 10  $\mu$ m.

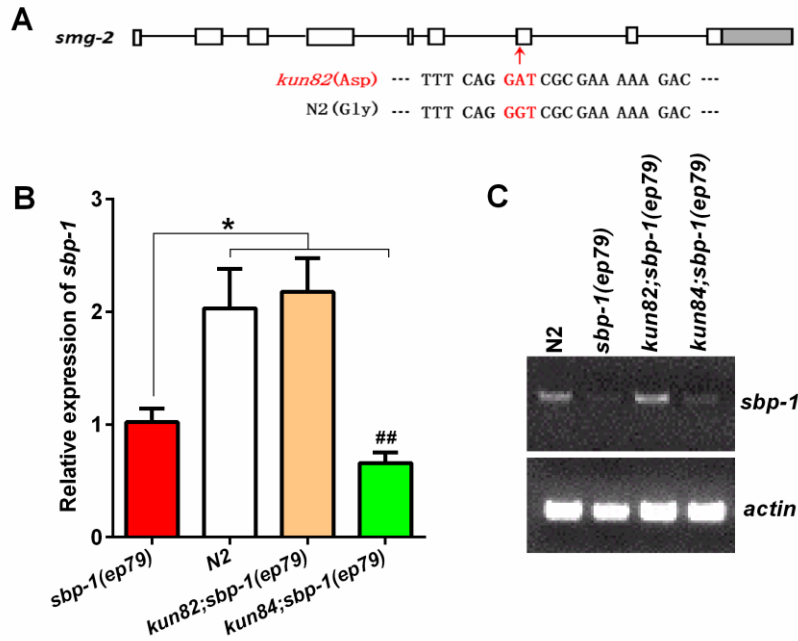

**Supplemental Figure S4. *kun82* mutation of *smg-2*.**

(A) The gene structure and *kun82* mutation of *smg-2*.

(B) Relative mRNA expression of *sbp-1* by QPCR. The data presented are the mean  $\pm$  SEM of 4 biological repeats.

(C) The mRNA expression of *sbp-1* by semi-QPCR.

The statistical analysis was performed using analysis of variance (ANOVA). Significant difference between WT (N2) and a specific worm strain, ##:  $P < 0.01$ . Significant difference between *sbp-1(ep79)* mutant and a specific worm strain, \*:  $P < 0.05$ .

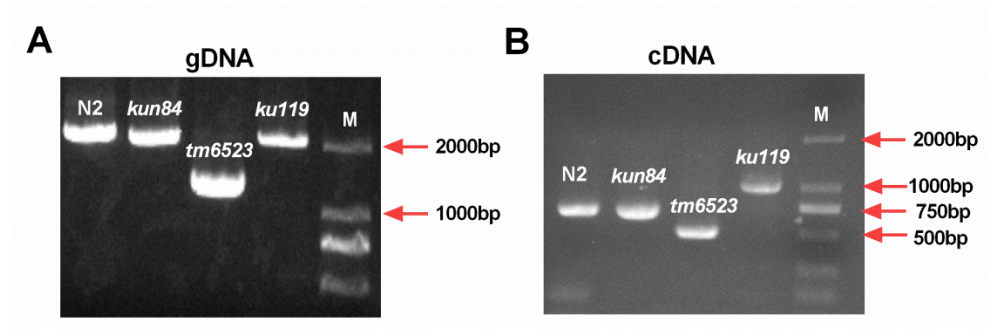

**Supplemental Figure S5. The genotypes of *sur-7* alleles.**

gDNA amplicon (A) and cDNA transcripts (B) of *sur-7* in wild type N2 (686 bp, 1978 bp) and three mutants *kun84* (686 bp, 1978 bp), *tm6523* (490 bp, 1412 bp) and *ku119* (1147 bp, 1978 bp).



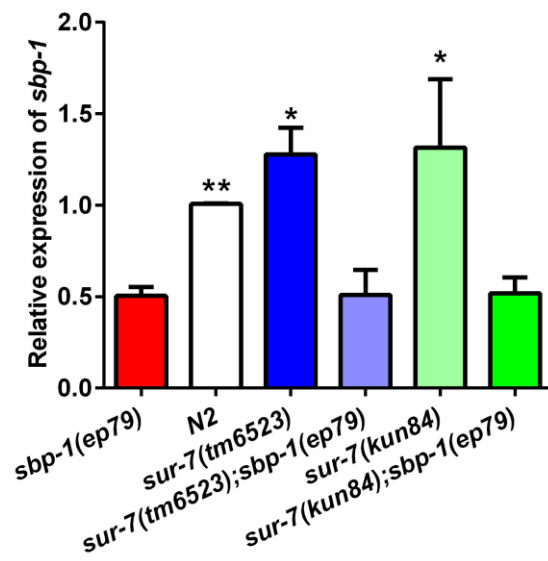

**Supplemental Figure S6. Relative mRNA expression of *sbp-1* by QPCR.**

The data presented are the mean  $\pm$  SEM of 3-4 biological repeats. The statistical analysis was performed using analysis of variance (ANOVA). Significant difference between the *sbp-1(ep79)* mutant and a specific worm strain, \*:  $P < 0.05$ , \*\*:  $P < 0.01$ .

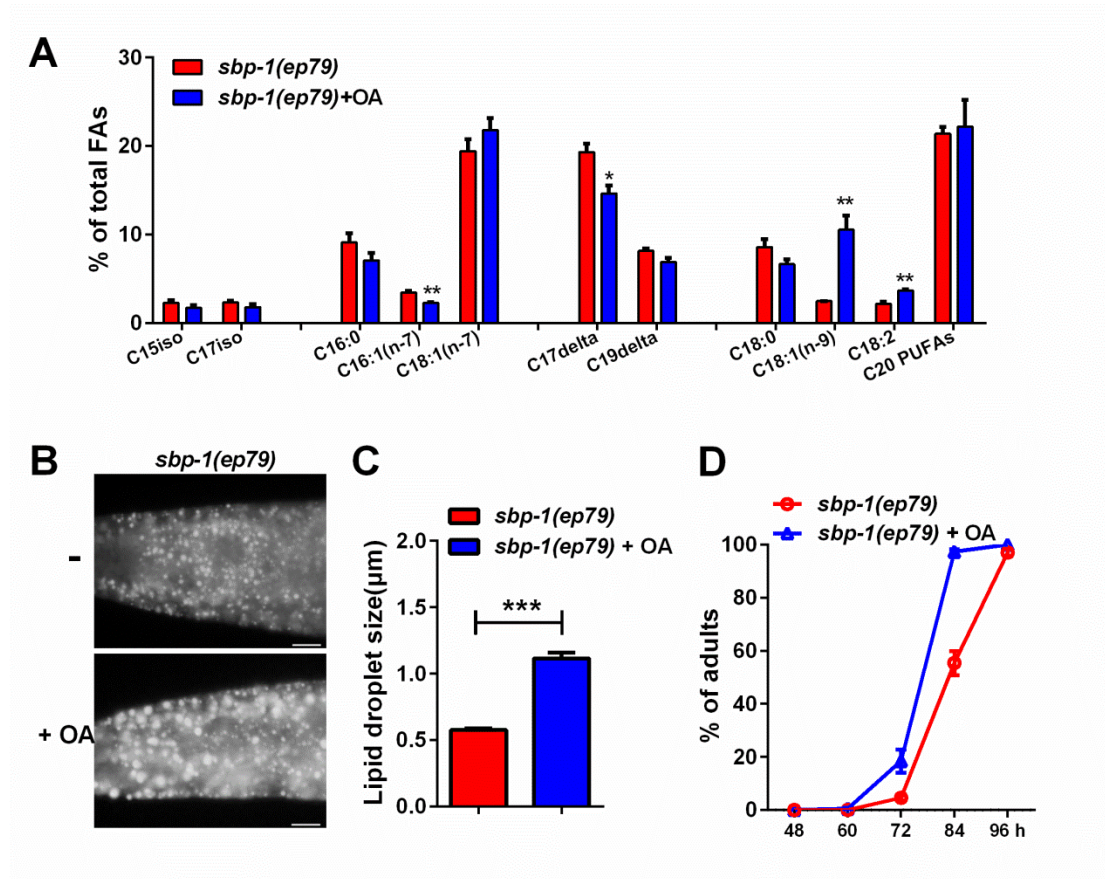

**Supplemental Figure S7. Dietary oleic acid (OA, C18:1(n-9)) improves the fat accumulation and growth of *sbp-1(ep79)* mutant.**

(A) Fatty acid profiles. The data presented are the mean  $\pm$ SEM of 4 biological repeats.

(B) Nile Red staining of fixed worms. Representative animals, anterior is on the right and posterior is on the left. Scale bar represents 10  $\mu$ m.

(C) Lipid droplet size in the posterior region of intestines from 6 worms of each worm condition. The data are presented as mean  $\pm$ SEM.

(D) The growth rate of worms. The data are presented as the mean  $\pm$ SEM of 3 biological repeats, of which at least 500 worms were counted for each worm strain.

The statistical analysis was performed using the t-test. Significant difference between with OA and without OA, \*:  $P < 0.05$ , \*\*:  $P < 0.01$ , \*\*\*:  $P < 0.001$ .

## Supplementary Tables

### Supplemental Table S1. Experimental Models: Organisms/Strains

| <i>C. elegans</i>                                                         |                                         |
|---------------------------------------------------------------------------|-----------------------------------------|
| N2                                                                        | Caenorhabditis Genetics Center (CGC)    |
| CB4856                                                                    | CGC                                     |
| EG4322( <i>ttTi5605;unc-119(ed3)</i> )                                    | CGC                                     |
| <i>sur-7(ku119)</i>                                                       | CGC                                     |
| XA6900, <i>pha-1(e2123ts)III;qaEx01[Pftn-1::pes-10::GFP-his;pha-1(+)]</i> | CGC                                     |
| BX115, <i>lin-15(n765)X;waEx16[fat-6::GFP;lin-15(+)]</i>                  | Lab of Watts, J.L.                      |
| KQ377,N2; <i>ftISf[epEx307[unc-119(+);Psbp-1::GFP::SBP-1]</i>             | Lab of Watts, J.L.                      |
| <i>sbp-1(ep79)</i>                                                        | Lab of Watts, J.L.                      |
| <i>fat-6(tm331);fat-7(wa37)</i>                                           | Lab of Watts, J.L.                      |
| <i>kunEx161[unc-119(ed3);fat-5::gfp+unc-119(+)]</i>                       | This study                              |
| <i>kunEx162[unc-119(ed3); fat-7::gfp+unc-119(+)]</i>                      | This study                              |
| <i>sur-7(tm6523);sbp-1(ep79)</i>                                          | This study                              |
| <i>sur-7(ku119);sbp-1(ep79)</i>                                           | This study                              |
| <i>sur-7(tm6523)</i>                                                      | National Bioresource Project            |
| <i>E. coli</i>                                                            |                                         |
| OP50                                                                      | CGC                                     |
| HT115                                                                     | Ahringer <i>C. elegans</i> RNAi library |
| Plasmids                                                                  |                                         |
| <i>pJL43.1 (Pglh-2::MosTase::glh-2utr)</i>                                | Lab of Guang, S.H.                      |
| <i>pCFJ90 (Pmyo-2::mCherry::unc54utr)</i>                                 | Lab of Guang, S.H.                      |
| <i>pCFJ151(ttTi5605_MCS)</i>                                              | Lab of Guang, S.H.                      |
| <i>pPD95.75</i>                                                           | CGC                                     |

**Supplemental Table S2. List of genes that are upregulated or downregulated by zinc reduction (TPEN 2.5  $\mu$ M and 5  $\mu$ M) in the transcriptional profile. The red highlights indicate upregulation and blue indicates downregulation.**

| Gene name       | log2 (fold-change) |            | Biological function                       |
|-----------------|--------------------|------------|-------------------------------------------|
|                 | T2.5 vs. CON       | T5 vs. CON |                                           |
| Y53G8AM.5       | 4.15859            | 9.1586     | Integral to membrane                      |
| <i>clec-17</i>  | 3.48039            | 7.73523    | CUB domain, C-type lectin                 |
| R08F11.4        | 3.37378            | 8.66818    | Methyltransferase type 11                 |
| <i>cyp-14A4</i> | 3.32968            | 6.66057    | Cytochrome P450 family                    |
| Y54G9A.4        | 3.29906            | 6.08956    | Zinc/iron permease                        |
| F44E7.5         | 3.03179            | 5.14599    | unknown                                   |
| T02B5.1         | 3.03005            | 5.01186    | unknown                                   |
| F56C3.9         | 2.83383            | 4.97506    | Peptidase, cysteine peptidase active site |
| <i>cyp-13B1</i> | 2.42192            | 4.082      | Cytochrome P450 family                    |
| <i>col-176</i>  | 2.39094            | 5.47871    | Integral to membrane                      |
| <i>dpy-6</i>    | 2.25449            | 4.51357    | Body morphogenesis                        |
| Y39G8B.7        | 2.25276            | 7.19973    | Metridin-like ShK toxin                   |
| F40F8.5         | 2.11251            | 3.16296    | unknown                                   |
| <i>lip1-4</i>   | 2.10546            | 3.30098    | LIPase Like                               |
| <i>col-128</i>  | 2.06526            | 3.05315    | COLlagen                                  |
| <i>cdh-7</i>    | 2.01772            | 3.66764    | CaDHerin family                           |
| <i>dpy-17</i>   | 1.9434             | 3.06625    | Body morphogenesis                        |
| <i>ins-35</i>   | 1.92629            | 3.30605    | INSulin related                           |
| F35F10.1        | 1.86259            | 4.08071    | PAW domain                                |
| <i>wrt-10</i>   | 1.8498             | 2.69377    | WaRThog (hedgehog-like family)            |
| F59D6.3         | 1.80578            | 4.87681    | Proteolysis                               |
| C15F1.2         | 1.7826             | 2.67402    | unknown                                   |
| <i>let-653</i>  | 1.69241            | 3.02024    | PAN/Apple domain                          |

|                  |         |         |                                                              |
|------------------|---------|---------|--------------------------------------------------------------|
| <i>col-98</i>    | 1.65801 | 5.09508 | COLlagen                                                     |
| <i>ftn-1</i>     | 1.64566 | 3.36036 | Ferritin                                                     |
| H19M22.3         | 1.64332 | 2.5008  | Zinc Metalloprotease                                         |
| <i>ugt-57</i>    | 1.63253 | 3.07465 | UDP-glucuronosyl/UDP-glucosyltransferase                     |
| F12E12.11        | 1.57206 | 4.69358 | Oxidation reduction                                          |
| <i>cdh-10</i>    | 1.51497 | 2.75909 | CaDHerin family                                              |
| B0205.13         | 1.48627 | 3.93527 | unknown                                                      |
| <i>cyp-13A12</i> | 1.48343 | 3.19764 | Cytochrome P450 family                                       |
| <i>clec-70</i>   | 1.47895 | 3.59687 | Lectin C-type domain                                         |
| H41C03.1         | 1.46756 | 2.92563 | CRAL-TRIO lipid binding domain                               |
| <i>peb-1</i>     | 1.45934 | 2.63915 | Pharyngeal Enhancer Binding                                  |
| R186.1           | 1.44084 | 2.67407 | Transport and Golgi organization protein 2                   |
| C09F9.2          | 1.38334 | 2.27175 | Cellobiose dehydrogenase                                     |
| <i>cyp-14A1</i>  | 1.36872 | 4.28838 | Cytochrome P450 family                                       |
| H14E04.1         | 1.34922 | 2.58371 | Cyclopropane-fatty-acyl-phospholipid synthase activity       |
| <i>col-103</i>   | 1.3482  | 4.70255 | Collagen triple helix repeat                                 |
| F46F2.3          | 1.30777 | 3.06452 | Embryo development                                           |
| <i>ugt-62</i>    | 1.27479 | 2.8616  | UDP-glucosyltransferase                                      |
| F19C7.2          | 1.24814 | 2.26139 | Peptidase activity                                           |
| Y69H2.14         | 1.22206 | 4.67948 | Collagen triple helix repeat                                 |
| F58G6.9          | 1.19581 | 2.9528  | Ctr copper transporter                                       |
| <i>ugt-19</i>    | 1.13324 | 3.04431 | UDP-glucosyltransferase                                      |
| Y39A1A.9         | 1.08424 | 2.32969 | Meiosis-specific coiled-coil domain-containing protein MEIOC |
| <i>cdh-3</i>     | 1.08326 | 2.13896 | CaDHerin family                                              |
| <i>nspc-16</i>   | 1.06096 | 2.38994 | Nematode Specific Peptide family, group C                    |
| <i>cdr-4</i>     | 1.04886 | 3.88268 | CDR-4 protein; Thioredoxin fold                              |
| <i>ugt-61</i>    | 1.02708 | 2.66684 | UDP-glucosyltransferase                                      |
| DC2.5            | 1.02045 | 2.74685 | Oxidoreductase activity                                      |

|                |           |          |                                   |
|----------------|-----------|----------|-----------------------------------|
| F17B5.1        | 1.01637   | 2.35435  | Thioredoxin-like fold             |
| <i>lec-4</i>   | 0.985009  | 2.90739  | C-type lectin                     |
| <i>cdr-2</i>   | 0.980387  | 3.10618  | Glutathione S-transferase         |
| F32H5.1        | 0.776059  | 2.35806  | Peptidase C1A                     |
| W05G11.6       | 0.7679    | 2.21235  | PhosphoenolpyruvateCarboxyKinase  |
| <i>smf-3</i>   | -0.412504 | -1.4595  | NRAMP family                      |
| <i>fat-7</i>   | -0.434893 | -2.98472 | Delta-9 fatty acid desaturase     |
| <i>sod-1</i>   | -0.663782 | -1.71361 | Copper/zinc superoxide dismutase  |
| ZK6.11         | -0.747434 | -3.17365 | Transmembrane glycoprotein        |
| F55G11.4       | -0.772387 | -1.69585 | CUB-like domain                   |
| <i>ilys-5</i>  | -0.805839 | -3.40043 | Invertebrate lysozyme             |
| T25B6.2        | -0.888966 | -3.52936 | NEPrilysinmetallopeptidase family |
| <i>fat-5</i>   | -0.89422  | -1.45747 | Delta-9 fatty acid desaturase     |
| C10C5.4        | -0.999393 | -2.02704 | Peptidase M20                     |
| <i>col-137</i> | -1.01546  | -3.00272 | COLlagen                          |
| F54D10.8       | -1.09477  | -4.80133 | DUF23                             |
| F25B4.8        | -1.19106  | -3.34302 | Carbon-sulfur lyase activity      |
| F15E11.15      | -1.19705  | -4.45448 | Protein Up-regulated in Daf-2(gf) |
| <i>thn-2</i>   | -1.26419  | -2.60181 | THaumatococcus family             |
| <i>pgp-6</i>   | -1.37754  | -2.56992 | P-Glycoprotein related            |
| Y52E8A.4       | -1.57916  | -3.22872 | Plugged Excretory Pore            |
| <i>gly-1</i>   | -1.69268  | -4.4856  | GLYcosylation related             |
| D1014.6        | -1.82807  | -8.42167 | DUF23                             |
| D1014.7        | -2.03979  | -7.72243 | DUF23                             |
| Y39B6A.24      | -2.06022  | -3.95699 | ASpartyl Protease                 |
| <i>mtl-2</i>   | -5.60473  | -6.56982 | Metallothioneins                  |
| C36C5.14       | -2.092    | -inf     | DUF19                             |
